# Supplementary material
Source: PubMed Central journal article supplement (PMC3948086)
Supplement: NIHMS56598-supplement-01.pdf [file NIHMS56598-supplement-01.pdf]

**Supplemental Table 1. Adjusted association of *TLR5*<sub>1846T>C</sub> with blood cytokine release induced by flagellin**

| <b>Cytokine</b>                | <b>Coefficient<sup>1</sup></b> | <b>95% CI</b>   | <b><i>P</i></b>        |
|--------------------------------|--------------------------------|-----------------|------------------------|
| <b>IL-6</b>                    | -0.146                         | -0.254 – 0.038  | 0.008                  |
| <b>IL-8</b>                    | -0.166                         | -0.258 – 0.074  | 4.6 x 10 <sup>-4</sup> |
| <b>TNF-<math>\alpha</math></b> | -0.136                         | -0.230 – 0.042  | 0.005                  |
| <b>IL-10</b>                   | -0.129                         | -0.247 – -0.10  | 0.033                  |
| <b>MCP-1</b>                   | -0.041                         | -0.105 – 0.023  | 0.211                  |
| <b>IL-1ra</b>                  | -0.038                         | -0.072 – -0.004 | 0.028                  |
| <b>G-CSF</b>                   | -0.229                         | -0.372 – -0.087 | 0.002                  |
| <b>IL-1<math>\beta</math></b>  | -0.157                         | -0.247 – -0.067 | 7.1 x 10 <sup>-4</sup> |

<sup>1</sup> Linear regression coefficient for *TLR5*<sub>1846T>C</sub> on log transformed cytokine levels induced by stimulation of whole blood from 300 healthy subjects with 500 ng/mL flagellin adjusting for age, sex, and monocyte count.
